# Supplementary material for: Synthesis, Characterization, and Anticancer Activity of Benzothiazole Aniline Derivatives and Their Platinum (II) Complexes as New Chemotherapy Agents
Source: Pharmaceuticals (Basel). 2021 Aug 23;14(8):832. doi: 10.3390/ph14080832 (PMC8399196; doi:10.3390/ph14080832)
Supplement: Supplementary file 1 [file pharmaceuticals-14-00832-s001.zip › pharmaceuticals-1340931-supplementary.pdf]

## Supplementary Files

### Synthesis, Characterization, and Anticancer Activity of Benzothiazole Aniline Derivatives and Their Platinum (II) Complexes as a New Chemotherapy Agents

Md. Kamrul Islam <sup>1</sup>, Ah-Rum Baek <sup>2</sup>, Bokyoung Sung <sup>2</sup>, Byeong-Woo Yang <sup>2</sup>, Garam Choi <sup>3</sup>, Hyun-Jin Park <sup>3</sup>, Yeoun-Hee Kim <sup>3</sup>, Minsup Kim <sup>4</sup>, Seongmin Ha <sup>5</sup>, Gang-Ho Lee <sup>6</sup>, Hee-Kyung Kim <sup>7,\*</sup> and Yongmin Chang <sup>2,8,9,\*</sup>

1. Institute of Biomedical Engineering Research, Kyungpook National University, 680, Gukchaebosang-ro, Jung-gu, Daegu 41944, Korea
2. Department of Medical & Biological Engineering, Kyungpook National University, 80, Daehak-ro, Buk-gu, Daegu 41566, Korea
3. R&D Center, Mirae BioPharm. Co., 124, Sagimakgol-ro, Jungwon-gu, Gyeonggi-do, 13207, Korea
4. InCerebro Drug Discovery Institute, 01811, Seoul, Korea
5. Department of Medical Science, School of Medicine, Kyungpook National University, 680, Gukchaebosang-ro, Jung-gu, Daegu 41944, Korea
6. Department of Chemistry, Kyungpook National University, 80, Daehak-ro, Buk-gu, Daegu 41566, Korea
7. Laboratory Animal Center, the Daegu-Gyeongbuk Medical Innovation Foundation, 88 Dongnae-ro, Dong-gu, Daegu 41061, Korea
8. Department of Molecular Medicine, School of Medicine, Kyungpook National University, 680, Gukchaebosang-ro, Jung-gu, Daegu 41944, Korea
9. Department of Radiology, Kyungpook National University Hospital, 130 Dongdeok-ro, Jung-gu, Daegu 41944, Korea

\* Correspondence: ychang@knu.ac.kr; Tel.: (+) 82-53-420-5471 (Y. C.); hkkim@dgmif.re.kr (H. K.K.)

## Contents

|     |                                                                                           |     |
|-----|-------------------------------------------------------------------------------------------|-----|
| 1.  | <b>Figure S1.</b> $^1\text{H}$ NMR spectrum of compound <b>L2</b> .                       | S3  |
| 2.  | <b>Figure S2.</b> High resolution-FAB- mass spectrum of compound <b>L2</b> .              | S3  |
| 3.  | <b>Figure S3.</b> FTIR spectrum of compound <b>L2</b> .                                   | S4  |
| 4.  | <b>Figure S4.</b> $^1\text{H}$ NMR spectrum of compound <b>L3</b> .                       | S5  |
| 5.  | <b>Figure S5.</b> High resolution-FAB- mass spectrum of compound <b>L3</b> .              | S5  |
| 6.  | <b>Figure S6.</b> $^1\text{H}$ NMR spectrum of compound <b>L1Pt</b> .                     | S6  |
| 7.  | <b>Figure S7.</b> $^{195}\text{Pt}$ NMR spectrum of compound <b>L1Pt</b> .                | S6  |
| 8.  | <b>Figure S8.</b> High resolution-FAB- mass spectrum of compound <b>L1Pt</b> .            | S7  |
| 9.  | <b>Figure S9.</b> $^1\text{H}$ NMR spectrum of compound <b>L2Pt</b> .                     | S7  |
| 10. | <b>Figure S10.</b> FTIR spectrum of compound <b>L2Pt</b> .                                | S8  |
| 11. | <b>Figure S11.</b> High resolution-FAB- mass spectrum of compound <b>L2Pt</b> .           | S8  |
| 12. | <b>Figure S12.</b> $^1\text{H}$ NMR spectrum of compound <b>L3Pt</b> .                    | S9  |
| 13. | <b>Figure S13.</b> Maldi-tof mass spectrum of compound <b>L3Pt</b> .                      | S9  |
| 14. | <b>Figure 14.</b> Time-dependent UV-Vis absorption spectra of <b>L1</b> and <b>L1Pt</b> . | S10 |
| 15. | <b>Figure 15.</b> Molecular docking of BTA, <b>L1</b> , and <b>L1Pt</b> with DNA.         | S10 |
| 16. | <b>Figure 16.</b> Molecular docking of BTA, <b>L1</b> , and <b>L1Pt</b> with DNA.         | S11 |

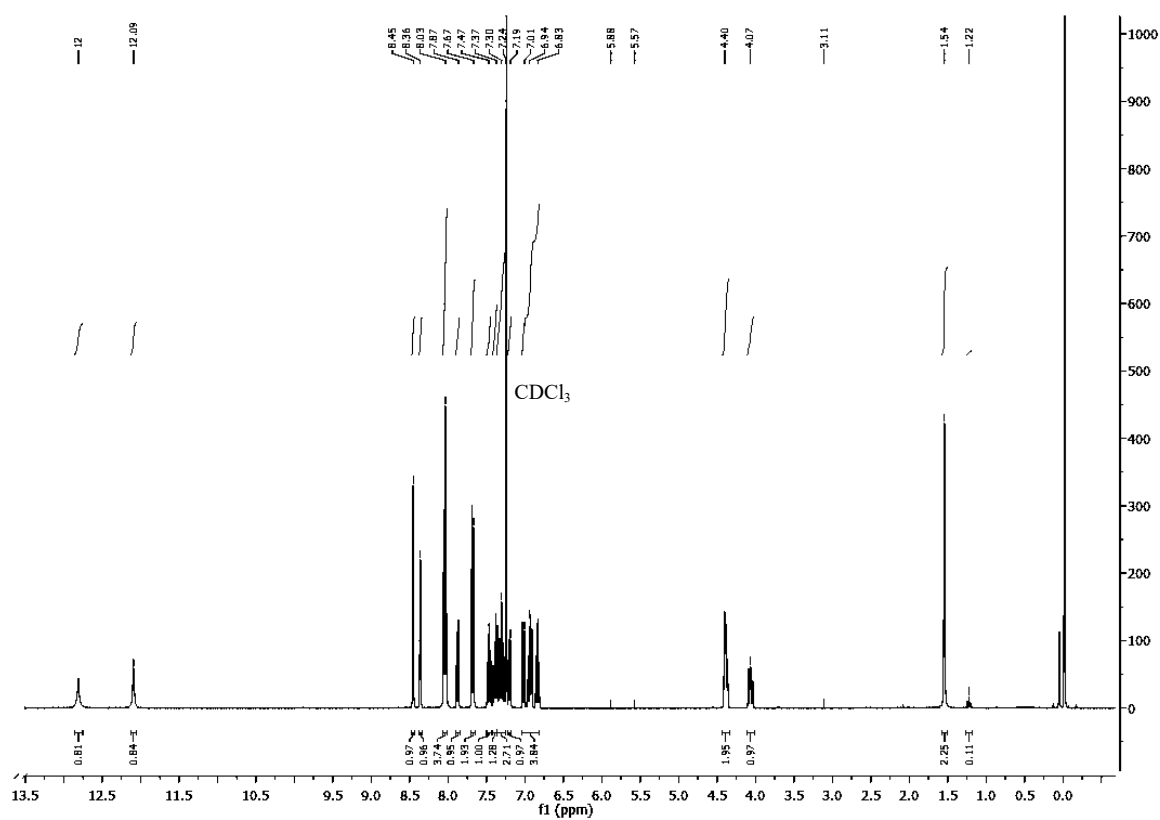

**Figure S1.** <sup>1</sup>H NMR spectrum of compound L2.

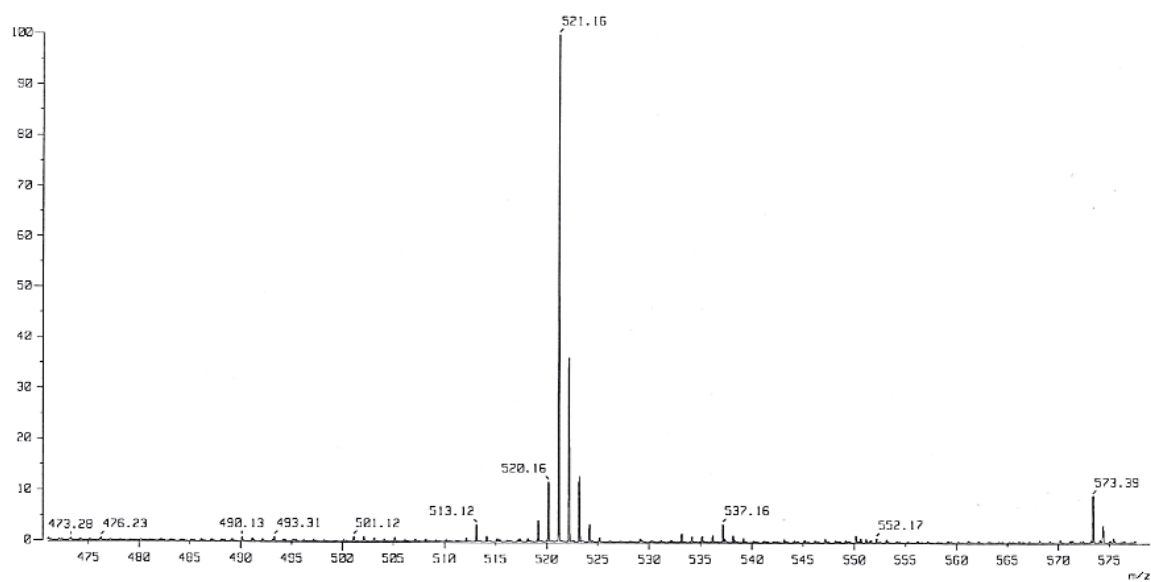

**Figure S2.** High resolution-FAB- mass spectrum of compound L2.

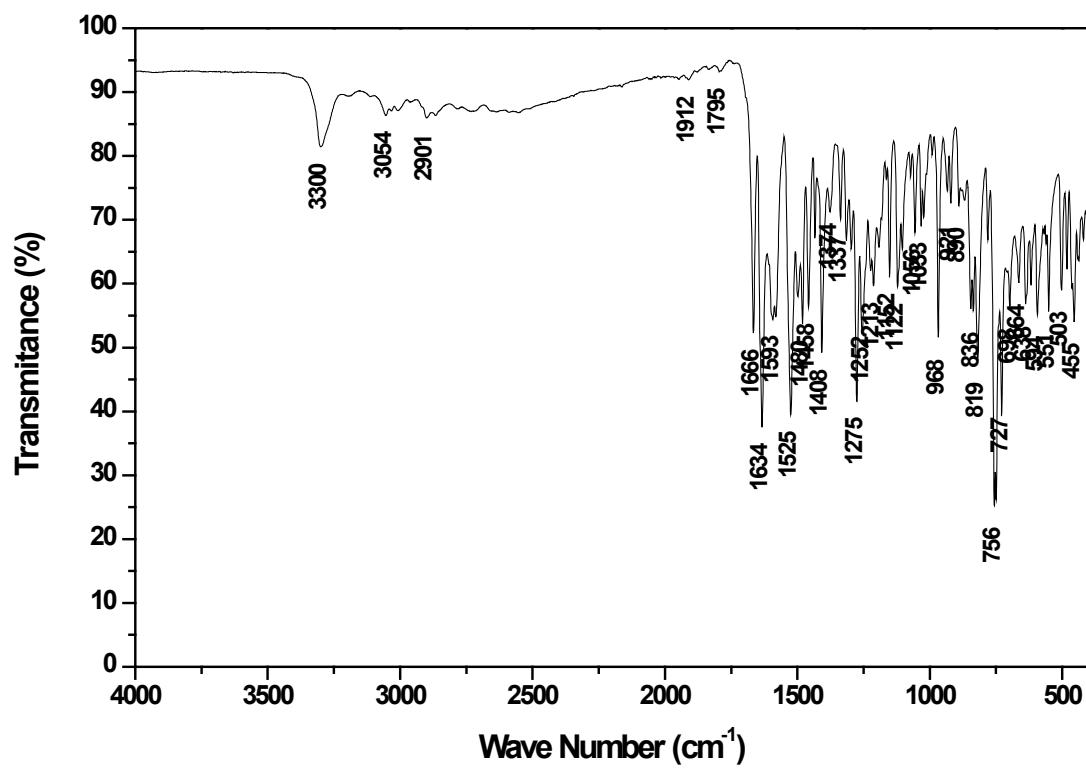

Figure S3. FTIR spectrum of compound L2.

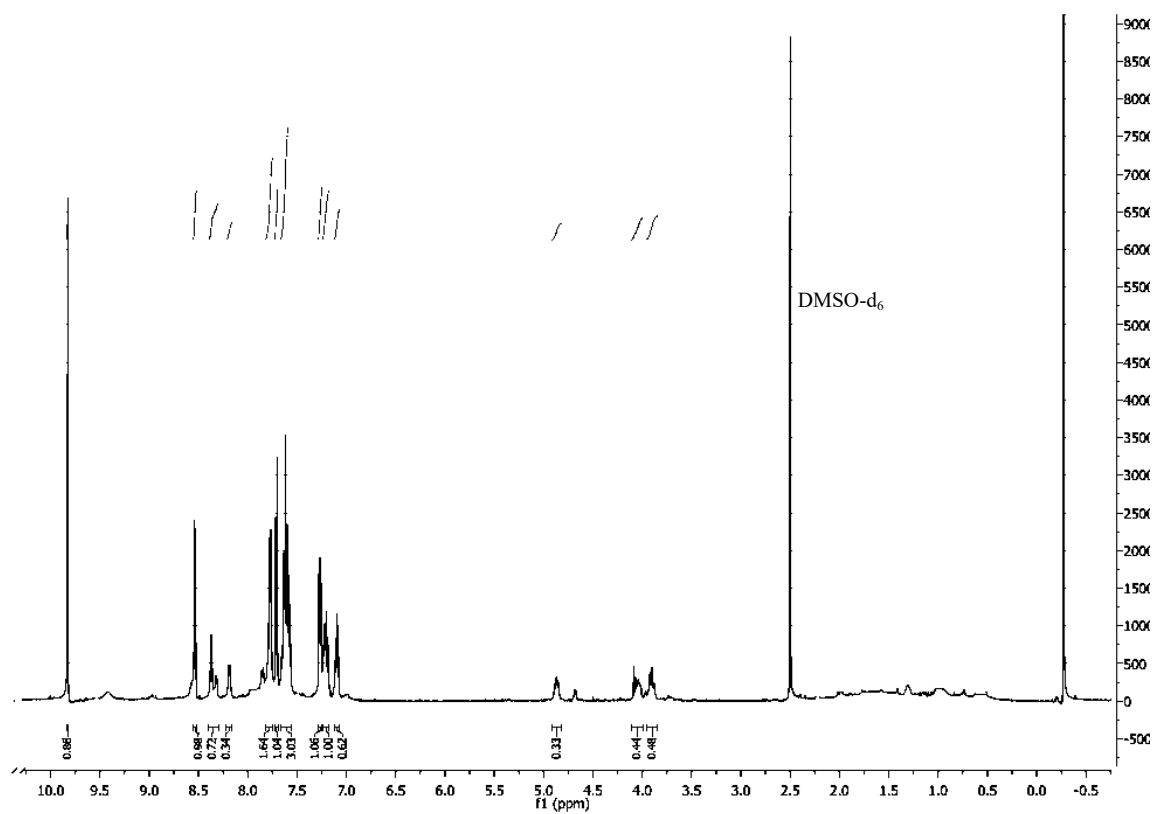

**Figure S4.** <sup>1</sup>H NMR spectrum of compound L3.

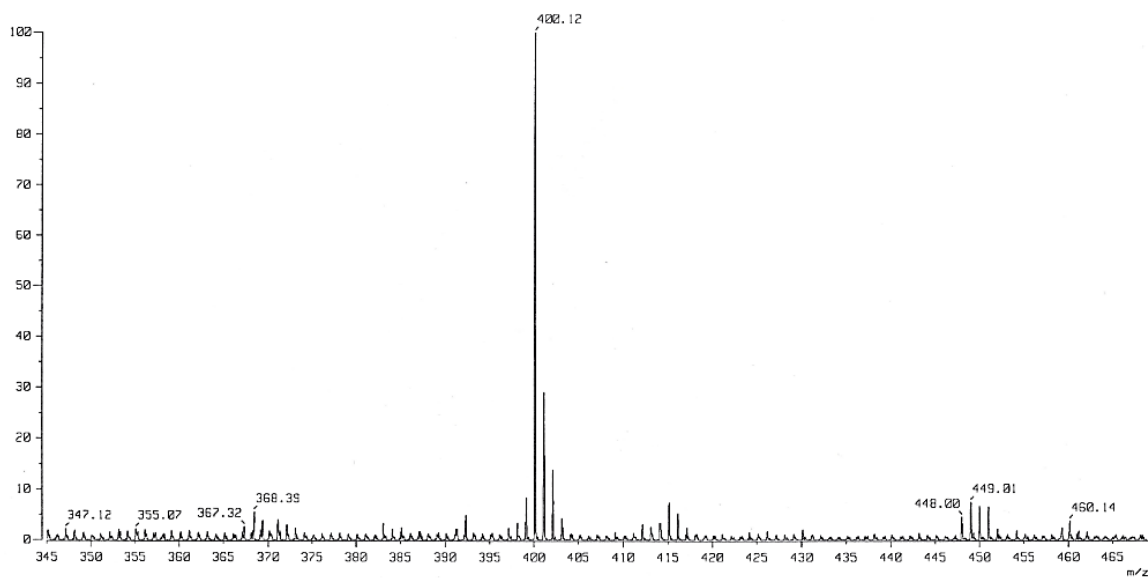

**Figure S5.** High resolution-FAB- mass spectrum of compound L3.

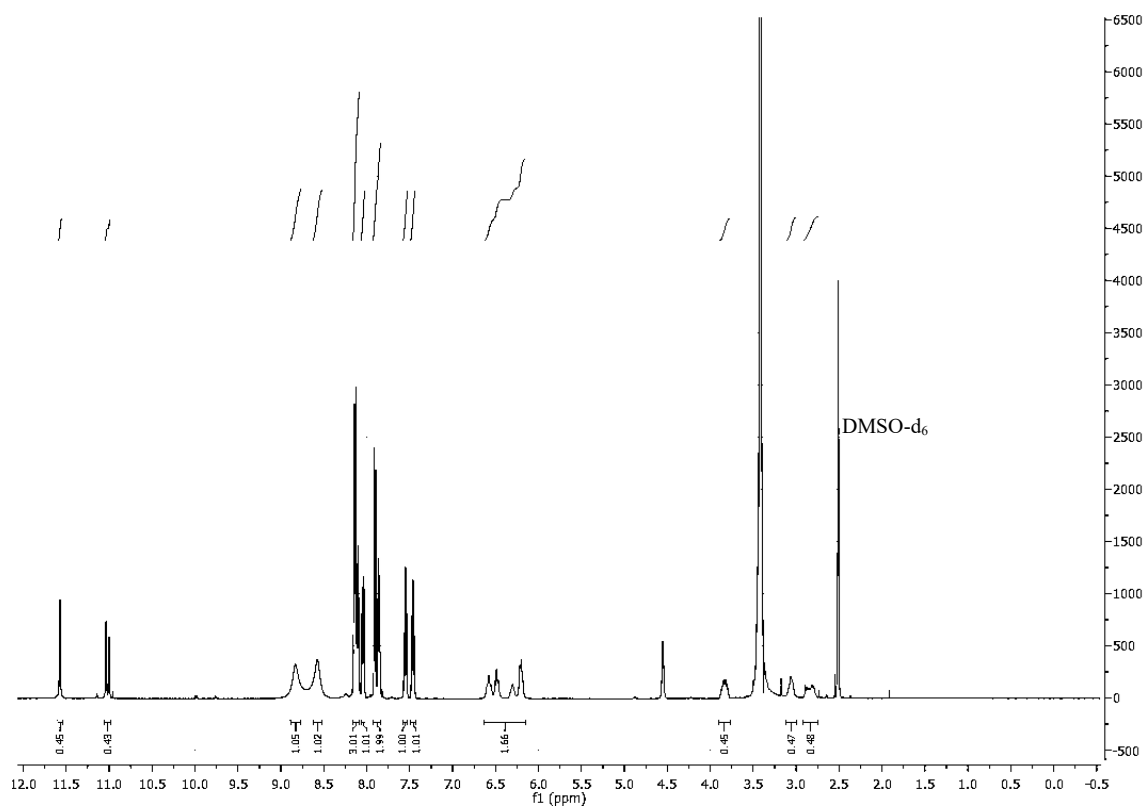

**Figure S6.**  $^1\text{H}$  NMR spectrum of compound L1Pt.

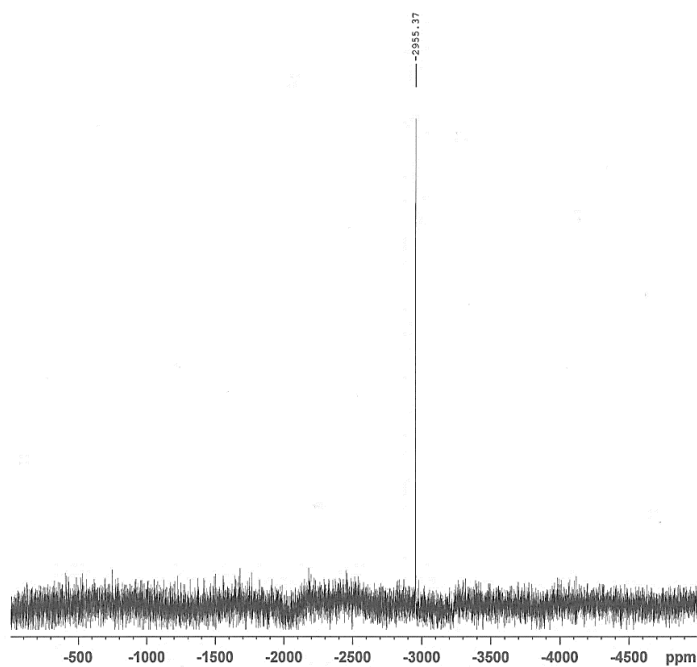

**Figure S7.**  $^{195}\text{Pt}$  NMR chemical shift (ppm) of compound L1Pt.

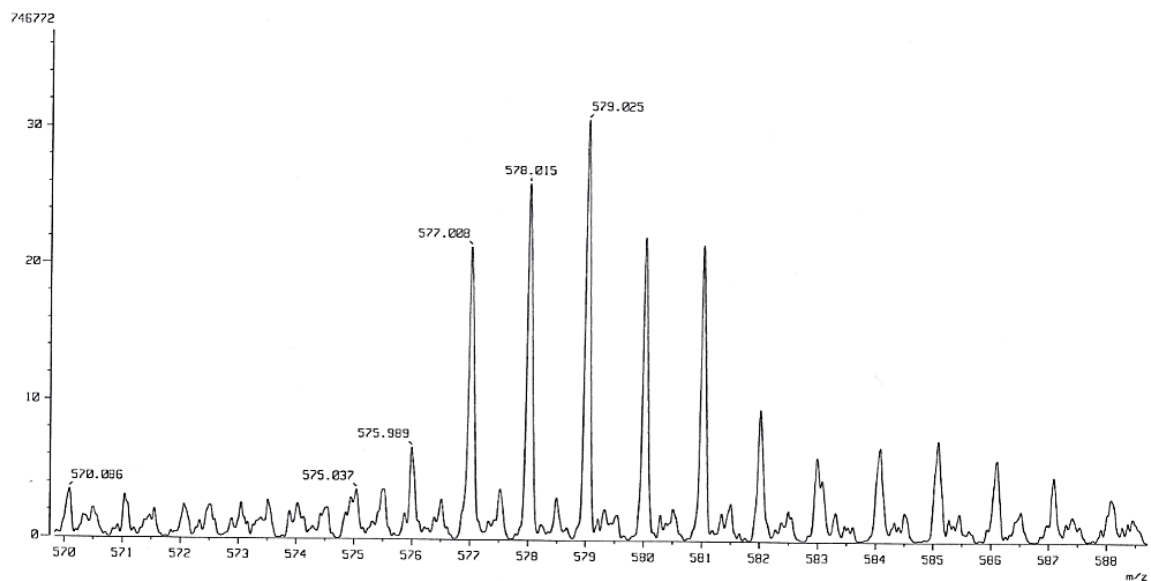

**Figure S8.** High resolution-FAB- mass spectrum of Compound **L1Pt**.

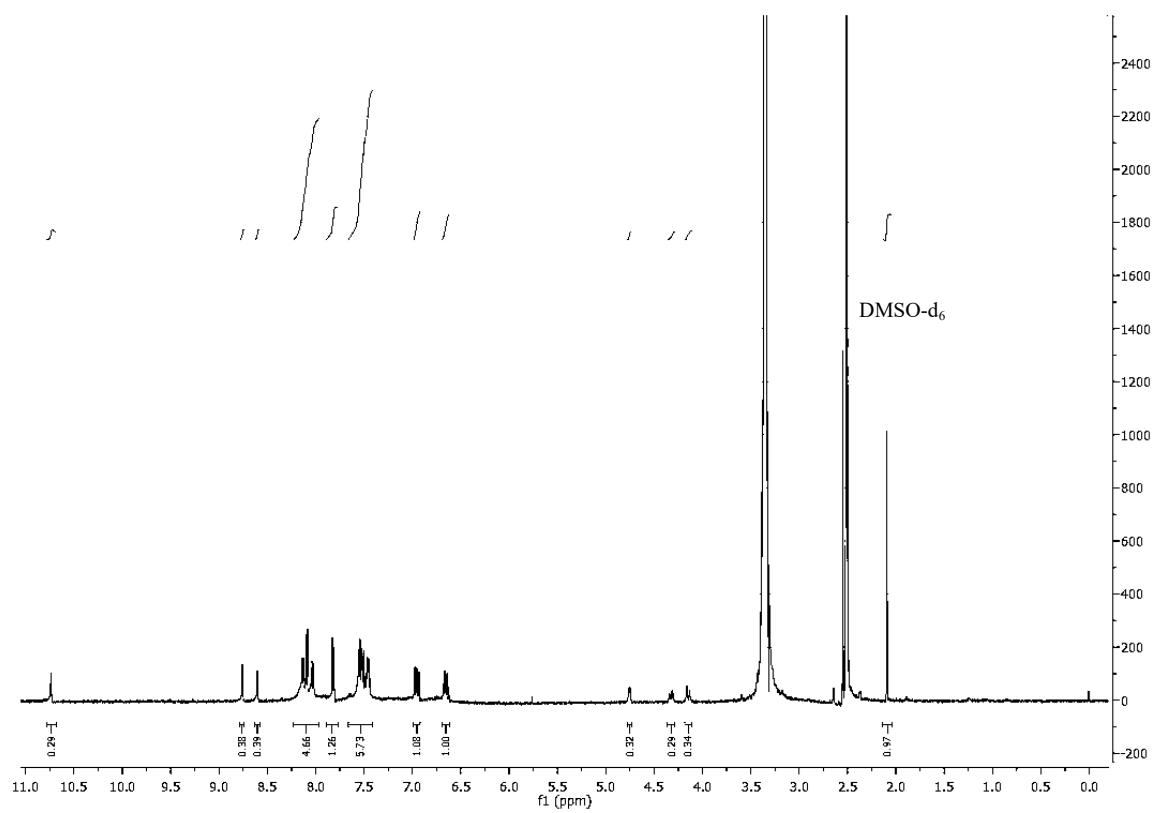

**Figure S9.**  $^1\text{H}$  NMR spectrum of compound **L2Pt**.

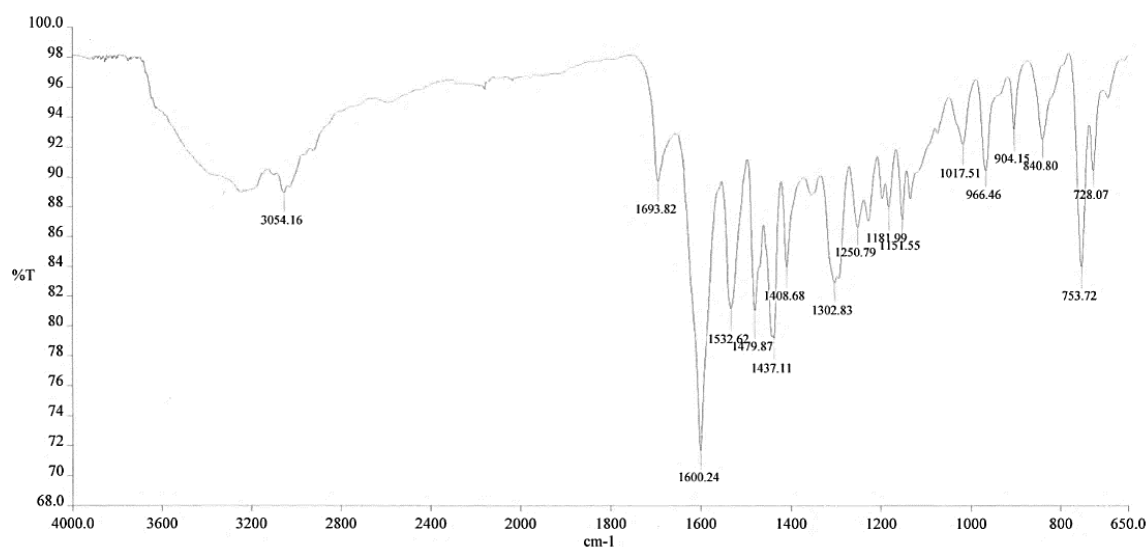

**Figure S10.** FTIR spectrum of compound **L2Pt**.

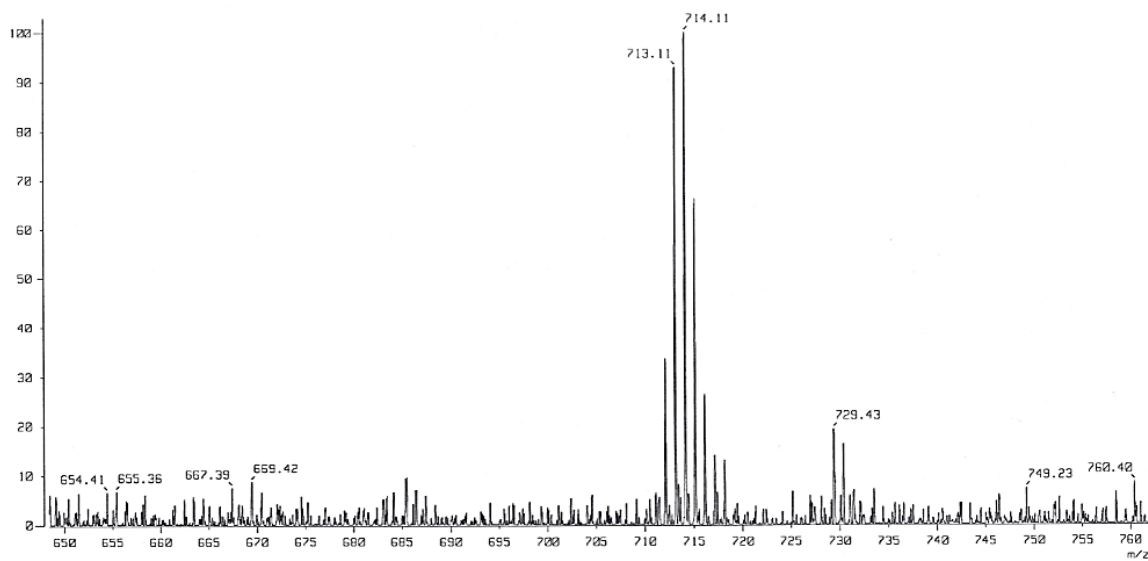

**Figure S11.** High resolution-FAB- mass spectrum of compound **L2Pt**.

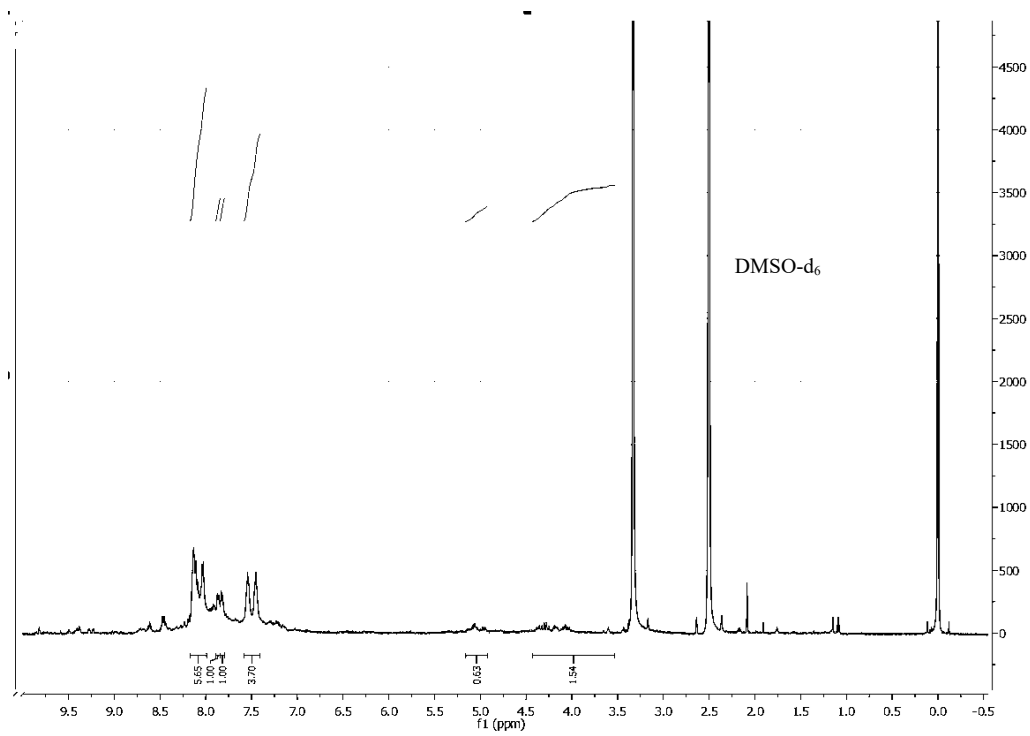

Figure S12. <sup>1</sup>H NMR spectrum of compound L3Pt.

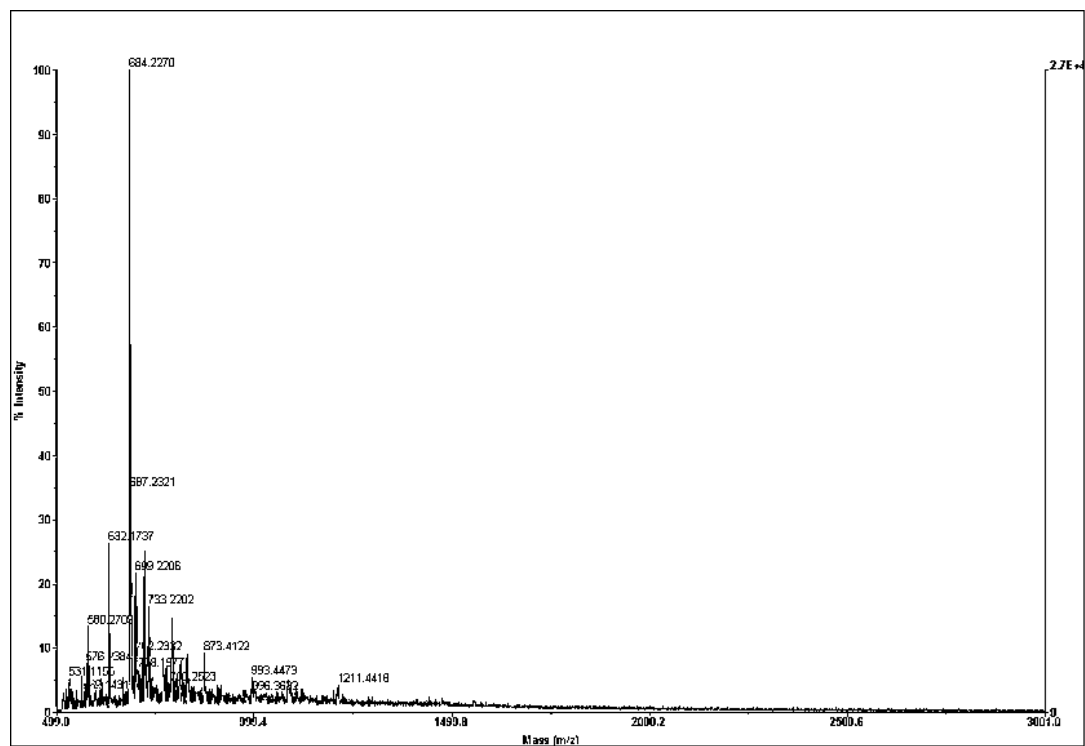

Figure S13. Maldi-tof mass spectrum of compound L3Pt.

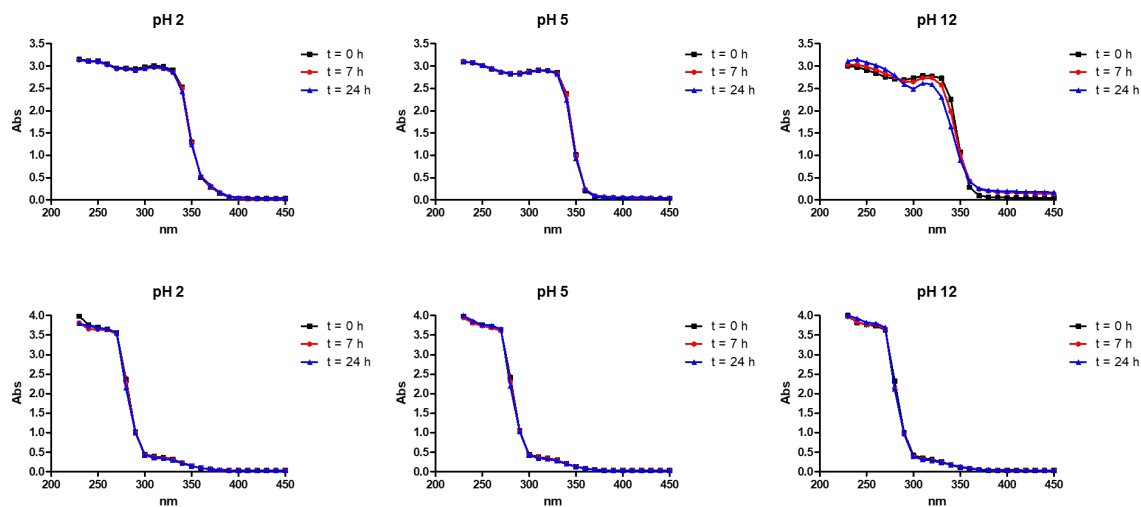

**Figure S14.** Time-dependent UV-Vis absorption spectra of compound **L1** (upper row) and **L1Pt** (lower row) in PBS solution recorded after  $t=0$  h (black line),  $t=7$  h (red line), and  $t=24$  h (blue line) in different pH (e.g. strong acidic, weakly acidic, neutral, alkaline).

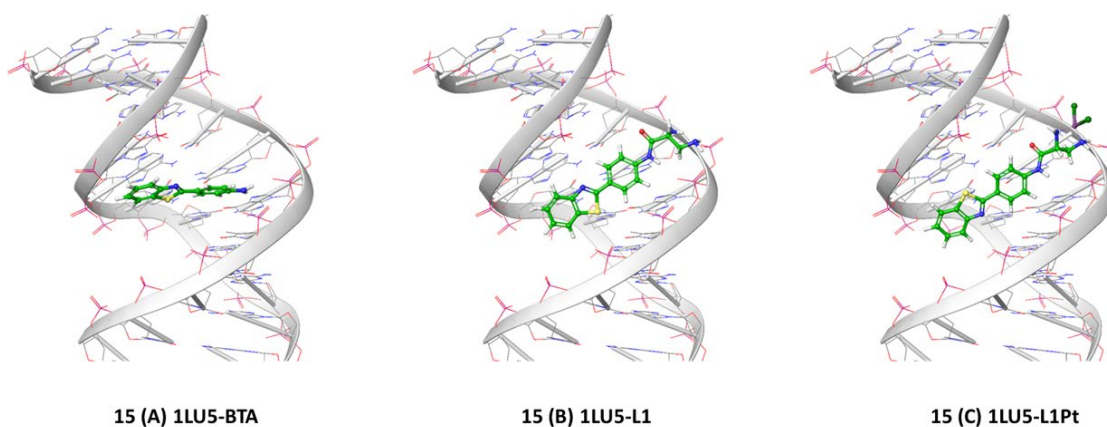

**Figure S15.** (A) Predicted binding pose of BTA on DNA (PDB ID: 1LU5). (B) Molecular docking simulation studies of the interaction between **L1** and DNA (PDB ID: 1LU5). (C) Molecular docking simulation studies of the interaction between **L1Pt** and DNA (PDB ID: 1LU5).

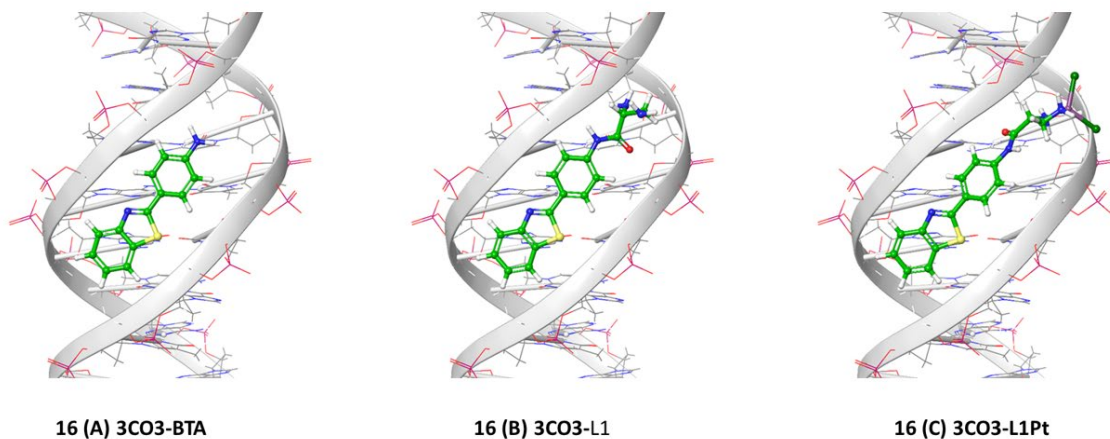

**Figure S16.** (A) Predicted binding pose of BTA on DNA (PDB ID: 3CO3). (B) Molecular docking simulation studies of the interaction between L1 and DNA (PDB ID: 3CO3). (C) Molecular docking simulation studies of the interaction between L1Pt and DNA (PDB ID: 3CO3).
